# Supplementary material
Source: Springer Nature journal article supplement (https://www.springermedizin.de/resource/supplementary/12889_2006_689_MOESM2_ESM.pdf/9502316)

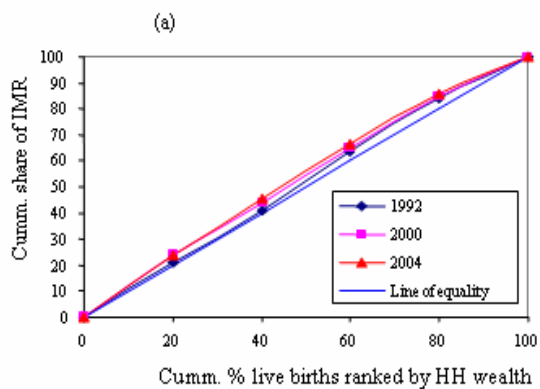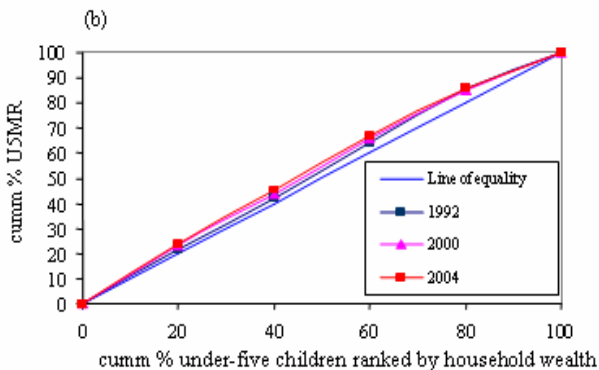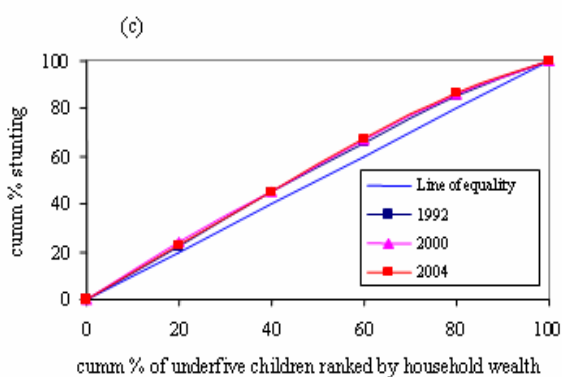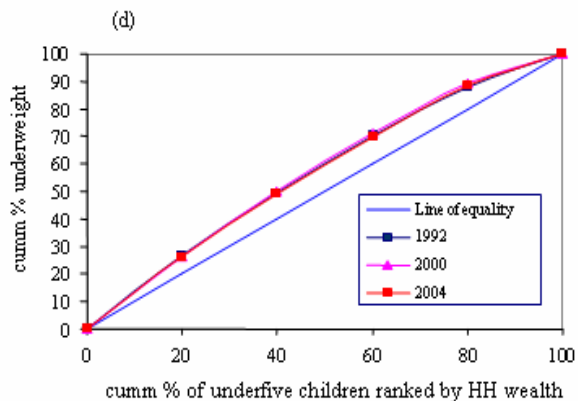

Supplement: MOESM2 [file 9502316]
